# Supplementary material for: Biogeographic parallels in thermal tolerance and gene expression variation under temperature stress in a widespread bumble bee
Source: PubMed Central journal article supplement (PMC7553916; doi:10.1038/s41598-020-73391-8), 2020-10-13
Supplement: 41598_2020_73391_MOESM1_ESM.pdf [file 41598_2020_73391_MOESM1_ESM.pdf]

1 **Supplementary Information for**  
2 **Biogeographic parallels in thermal tolerance and gene expression variation under**  
3 **temperature stress in a widespread bumble bee**

4  
5 Meaghan L. Pimsler<sup>1\*</sup>, Kennan J. Oyen<sup>2,3</sup>, James D. Herndon<sup>4</sup>, Jason M. Jackson<sup>1</sup>, James  
6 P. Strange<sup>4,5</sup>, Michael E. Dillon<sup>2</sup>, Jeffrey D. Lozier<sup>1\*</sup>

7 <sup>1</sup> Department of Biological Sciences, The University of Alabama, Tuscaloosa, Alabama  
8 35487, USA

9 <sup>2</sup> Department of Zoology and Physiology and Program in Ecology, University of  
10 Wyoming, Laramie, Wyoming 82071, USA

11 <sup>3</sup> Department of Biological Sciences, University of Cincinnati, Cincinnati, Ohio, 45221,  
12 USA

13 <sup>4</sup> USDA-ARS Pollinating Insects Research Unit, Utah State University, Logan, Utah  
14 84322, USA

15 <sup>5</sup> Department of Entomology, The Ohio State University, Columbus, Ohio 44691, USA

16 \*To whom correspondence should be addressed: Meaghan L. Pimsler  
17 mlpimsler@gmail.com  
18 Jeffrey D. Lozier  
19 jlozier@ua.edu  
20

21 **This PDF file includes:**

22 Supplementary text  
23 Fig. S1 to S2  
24 Tables S1 to S4  
25 Captions for Datasets S1 through S3  
26 References for SI citations  
27

28 **Other supplementary materials for this manuscript include the following:**

29 Datasets S1 to S3  
30  
31

## 32 **Supplementary Information Text**

### 33 **Methods**

#### 34 Queen Collection and Colony Foundation.

35 Queen *Bombus vosnesenskii* bees were collected by net from multiple sites between  
36 February and July 2016 (Table S1). To increase chances of successful laboratory colony  
37 foundation, we focused on queen bees which had recently emerged from hibernation but  
38 had not yet started a colony by collecting queen bees visiting flowers. As is typical of  
39 many bumble bees, hibernating queen emergence varies seasonally with latitude and  
40 elevation<sup>1</sup>, and it was not possible to collect queens from all regions in the same month.  
41 Queens were collected while foraging or flying using aerial insect nets, assigned a unique  
42 identification code, transferred to shipping vials and placed in a cooler for transport to the  
43 USDA-ARS Pollinating Insect Research Unit (PIRU) bumble bee rearing facility.

44 At PIRU, queens produced colonies following a protocol based on procedures by  
45 Evans et al.<sup>2</sup>, with modifications to maximize *B. vosnesenskii* production. Queens placed  
46 in plastic queen initiation boxes (2.25L) (Biobest, Leamington, ON), provided with a 500  
47 mg pollen provision (homogenous paste made of honey bee corbicular loads and sugar  
48 solution) dipped in honey bee wax to encourage nesting behavior. Each queen was also  
49 provided lab-made nectar solution in a plastic reservoir *ad libitum*. The queen initiation  
50 boxes were maintained at 0:24 L:D, 27° ± 1° C and 55-60% relative humidity (RH)<sup>3</sup>.  
51 Queens were checked daily for signs of nesting behavior, including wax secretion, honey  
52 pot construction, or presence of brood. After five workers had eclosed, the small colony  
53 was moved to a 7.75 L plastic hive box (Biobest, Leamington, ON). Additional pollen  
54 provisions (without a wax coating) were provided as needed. At 20+ workers, colonies  
55 were transported to the University of Wyoming for physiological experiments. During the  
56 course of nest initiation through the transport to the University of Wyoming, the queens  
57 and colonies were checked daily for presence of disease and pests and managed to  
58 maximize colony growth. Propagation, mating, and overwintering of queens for second-  
59 generation laboratory reared colonies was attempted but not possible for this species.

#### 61 Physiology Data Analysis.

62 We tested for statistical differences between queen collection locations for thermal  
63 maxima and minima in two separate pairs of analyses. All data were analyzed in R  
64 v3.5.1<sup>4</sup>. First, we tested for broad patterns based on region of origin used a mixed effect  
65 linear model approach, defining colony of origin as a random effect, using *lmer* from  
66 lme4 v1.1-18-1<sup>5</sup> and lmerTest v.3.1-1<sup>6</sup>. Next, we also tested for a relationship between  
67 either CT<sub>MAX</sub> or CT<sub>MIN</sub> and specific queen collection location using *lmer* and calculated  
68 the R<sup>2</sup> of the relationship using *r.squaredGLMM* from MuMIn v1.42.1<sup>7</sup>, against the  
69 following WorldClim<sup>8</sup> variables: Annual Mean Temperature, Maximum Temperature of  
70 the Warmest Month, Minimum Temperature of the Coldest Month, Mean Diurnal Range,  
71 and Isothermality.

#### 73 Weighted Gene Co-Expression Network Analysis.

74 To study broad patterns of gene expression, data were analyzed using WGCNA  
75 v1.64.1<sup>9</sup> following best practices as outlined in the package tutorials to identify modules  
76 of co-expressed genes that correlated with physiological and environmental variables,

77 similar to previous studies<sup>10,11</sup>. The data were prepared by quantile normalizing the  
78 filtered *logCPM* data used in the MDS and gene-by-gene (edgeR/limma<sup>12,13</sup>) analyses.  
79 Next, these data were used to construct a signed-hybrid network and classify modules using  
80 the step-by-step approach using pairwise Pearson correlations and a soft-threshold power  
81 of 6, as identified by *pickSoftThreshold*. Next, modules were identified with  
82 *cutreeDynamic* and merged if they demonstrated a correlation >75%. The resultant  
83 modules were then compared to environmental and physiological traits of the individual  
84 bees using Pearson correlation coefficients. The traits tested were: ColonyID, Latitude,  
85 Longitude, Elevation, Region, Treatment, Region by Treatment interaction, Annual Mean  
86 Temperature of queen collection location (from WorldClim) and CT<sub>TEMP</sub> (temperature of  
87 the individual bee at time of collection with control bees assigned 25°C). The modules  
88 with statistically significant correlation ( $P \leq 0.05$ , *corPvalueStudent*) to at least one trait  
89 variable was retained for further analysis. We then tested for a significant association  
90 between the modules and location of origin (using WorldClim Annual Mean  
91 Temperature<sup>8</sup> as a proxy) and temperature at time of sacrifice (using CT<sub>TEMP</sub>). We  
92 compared four linear mixed models of decreasing complexity (ColonyID as a random  
93 variable) using the eigengene value of each member of the module as the response  
94 variable. The model with the best fit to the module members was identified by iteratively  
95 comparing nested models using likelihood ratio tests<sup>14</sup> as implemented by lmerTest v3.0-  
96 1<sup>6</sup> using a  $P \leq 0.05$  of a Kenward-Rogers Approximation as our cutoff<sup>15</sup>. The best model  
97 was then compared to the null model to determine goodness of fit. Modules were also  
98 evaluated to identify the hub gene (gene with the highest level of connectivity to all other  
99 module members; *chooseTopHubInEachModule*), which gene ontology groups were  
100 enriched (following methods described above), and level of overlap with gene-by-gene  
101 differential expression results.  
102  
103

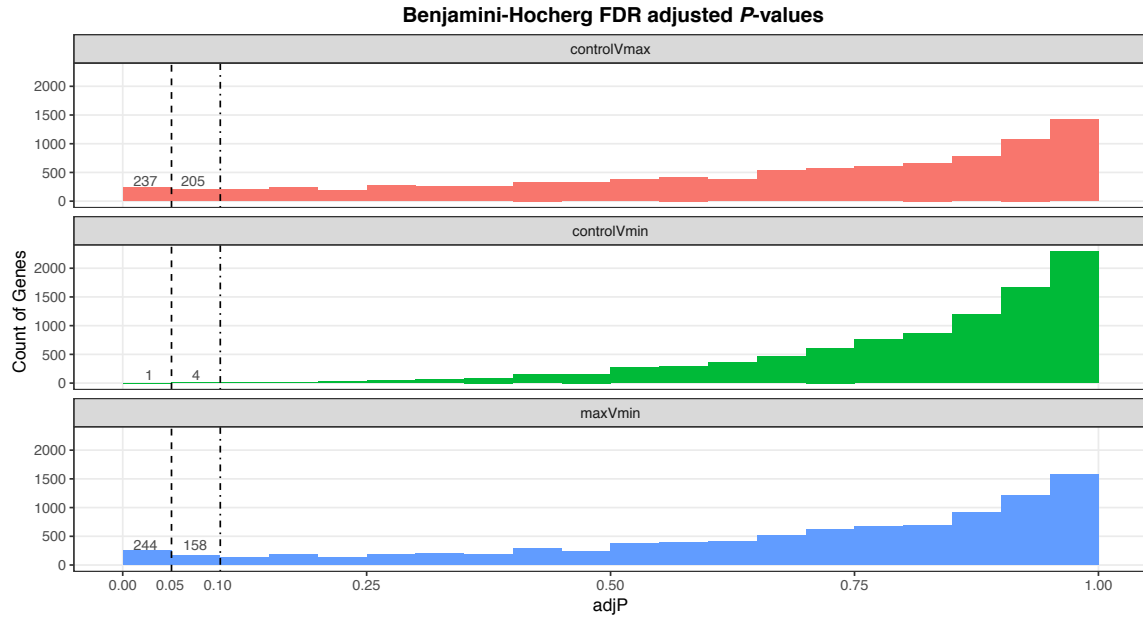

104  
105  
106  
107  
108  
109  
110

Fig. S1. Histogram of Benjamini-Hochberg false discovery rate corrected p-values for all genes in all three pairwise treatment contrasts. While the distribution of FDR corrected values are similar in distribution for contrasts with  $CT_{MAX}$  and both control and  $CT_{MIN}$ , very few genes are differentially expressed between control and  $CT_{MIN}$  treatment bees at both the  $P \leq 0.05$  level (left of the dashed line) and the  $P \leq 0.1$  level (left of the dash-dot line).

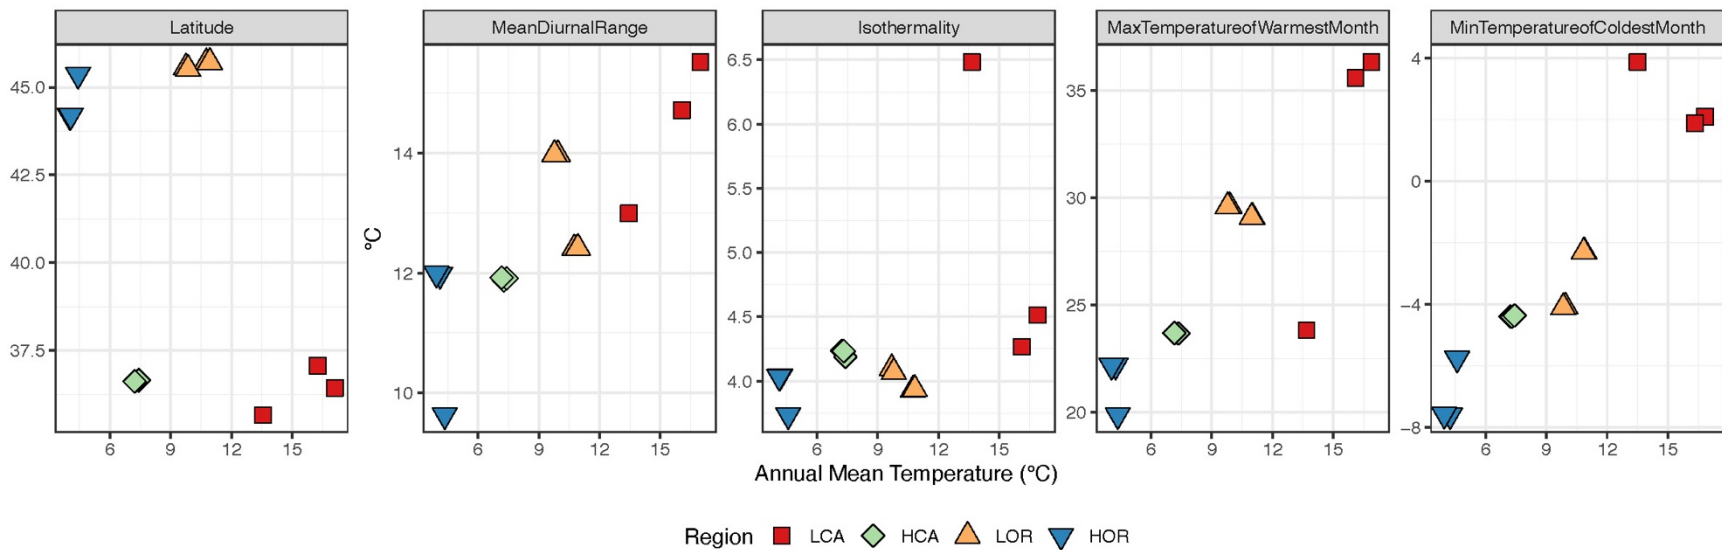

111  
 112 Fig. S2. Annual Mean Temperature is correlated with the other tested BioClim variables, but not with latitude illustrating how our  
 113 sampling design decouples space and climate.

114 Table S1. Collection sites for queen bees, with colony IDs matching those of queens

| Colony | State | Latitude  | Longitude  | Elevation (m) | Region |
|--------|-------|-----------|------------|---------------|--------|
| 160019 | CA    | 35.68882  | -121.28838 | 7             | L-CA   |
| 160034 | CA    | 36.39965  | -118.99074 | 224.9         | L-CA   |
| 160035 | CA    | 37.03608  | -119.5266  | 350.5         | L-CA   |
| 160095 | OR    | 45.696075 | -121.33883 | 70.1          | L-OR   |
| 160102 | OR    | 45.696075 | -121.33883 | 70.1          | L-OR   |
| 160131 | OR    | 45.535039 | -121.20785 | 441.4         | L-OR   |
| 160137 | OR    | 45.535039 | -121.20785 | 441.4         | L-OR   |
| 160457 | CA    | 36.63117  | -118.80432 | 2153.7        | H-CA   |
| 160460 | CA    | 36.63117  | -118.80432 | 2153.7        | H-CA   |
| 160462 | CA    | 36.63117  | -118.80432 | 2153.7        | H-CA   |
| 160637 | OR    | 44.22465  | -121.8717  | 1474.6        | H-OR   |
| 160652 | OR    | 45.3257   | -121.65949 | 1594.7        | H-OR   |
| 160664 | OR    | 44.22465  | -121.8717  | 1474.6        | H-OR   |

115

116

117 Table S2.  $CT_{MIN}$  and  $CT_{MAX}$  modeled by region. Region of origin as a categorical  
 118 variable (repeated measures ANOVA, including colony as a random effect) had a  
 119 significant effect on  $CT_{MIN}$  but not  $CT_{MAX}$ .  
 120

| ANOVA*     |               |    |       |        |       |         |
|------------|---------------|----|-------|--------|-------|---------|
| Treatment  | Error strata  | Df | SumSq | MeanSq | F     | P(F)    |
| $CT_{MAX}$ | Error: Colony |    |       |        |       |         |
|            | Region        | 3  | 216.9 | 72.31  | 3.009 | 0.095   |
|            | Residuals     | 8  | 192.2 | 24.03  |       |         |
|            | Error: Within |    |       |        |       |         |
| $CT_{MIN}$ | Residuals     | 12 | 199.3 | 16.61  |       |         |
|            | Error: Colony |    |       |        |       |         |
|            | Region        | 3  | 246.4 | 82.12  | 8.616 | 0.00691 |
|            | Residuals     | 8  | 76.25 | 9.54   |       |         |
|            | Error: Within |    |       |        |       |         |
|            | Residuals     | 12 | 35.58 | 2.965  |       |         |

121 \* Generalized ANOVA model:  $CT_{TEMP} \sim \text{Region} + \text{Error}(\text{ColonyID})$

122

123 Table S3. CT<sub>MIN</sub> and CT<sub>MAX</sub> modeled by five BioClim variables representing aspects of the thermal environment including colony as  
 124 a random effect using a generalized linear mixed model approach<sup>†</sup>. Four of the tested variables had a significant effect on CT<sub>MIN</sub> but  
 125 none had a significant relationship with CT<sub>MAX</sub>.

|                     | Annual Mean Temperature |                  | Maximum Temperature of the Warmest Month |                  | Minimum Temperature of the Coldest Month |                  | Mean Diurnal Range |                  | Isothermality |                  |       |
|---------------------|-------------------------|------------------|------------------------------------------|------------------|------------------------------------------|------------------|--------------------|------------------|---------------|------------------|-------|
|                     | (Int.)                  | AMT              | (Int.)                                   | MTWM             | (Int.)                                   | MTCM             | (Int.)             | MDR              | (Int.)        | Iso              |       |
| CT <sub>MIN</sub>   | Est.                    | -9.44            | 0.76                                     | -19.68           | 0.65                                     | -0.11            | 0.74               | -26.9            | 1.92          | -6.35            | 0.92  |
|                     | Stat.                   | -7.12            | 5.86                                     | -7.76            | 6.95                                     | -0.11            | 3.34               | -4.6             | 4.22          | -0.88            | 0.56  |
|                     | df                      | 10               | 10                                       | 10               | 10                                       | 10               | 10                 | 10               | 10            | 10               | 10    |
|                     | p                       | <b>&lt;0.001</b> | <b>&lt;0.001</b>                         | <b>&lt;0.001</b> | <b>&lt;0.001</b>                         | 0.917            | <b>0.007</b>       | <b>0.001</b>     | <b>0.002</b>  | 0.401            | 0.59  |
|                     | σ <sup>2</sup>          | 2.97             |                                          | 2.97             |                                          | 2.97             |                    | 2.97             |               | 2.97             |       |
|                     | τ <sub>00</sub>         | 2.15 ColonyID    |                                          | 1.28 ColonyID    |                                          | 6.14 ColonyID    |                    | 4.31 ColonyID    |               | 14.16 ColonyID   |       |
|                     | ICC                     | 0.42             |                                          | 0.3              |                                          | 0.67             |                    | 0.59             |               | 0.83             |       |
|                     | N                       | 12 ColonyID      |                                          | 12 ColonyID      |                                          | 12 ColonyID      |                    | 12 ColonyID      |               | 12 ColonyID      |       |
|                     | Obs.                    | 24               |                                          | 24               |                                          | 24               |                    | 24               |               | 24               |       |
|                     | Marg.R <sup>2</sup>     | 0.680            |                                          | 0.732            |                                          | 0.448            |                    | 0.553            |               | 0.024            |       |
| Cond.R <sup>2</sup> | 0.814                   |                  | 0.813                                    |                  | 0.820                                    |                  | 0.818              |                  | 0.831         |                  |       |
| CT <sub>MAX</sub>   | Est.                    | 54.82            | -0.37                                    | 59.64            | -0.31                                    | 50.16            | -0.4               | 60.43            | -0.71         | 51.49            | -0.02 |
|                     | Stat.                   | 19               | -1.3                                     | 9.48             | -1.33                                    | 31.79            | -1.2               | 5.72             | -0.86         | 6.3              | -0.01 |
|                     | df                      | 9.95             | 10.04                                    | 10               | 10.11                                    | 10.56            | 9.99               | 10.09            | 10.04         | 10.43            | 10.29 |
|                     | p                       | <b>&lt;0.001</b> | 0.222                                    | <b>&lt;0.001</b> | 0.211                                    | <b>&lt;0.001</b> | 0.256              | <b>&lt;0.001</b> | 0.409         | <b>&lt;0.001</b> | 0.992 |
|                     | σ <sup>2</sup>          | 16.78            |                                          | 16.85            |                                          | 16.69            |                    | 16.55            |               | 16.6             |       |
|                     | τ <sub>00</sub>         | 8.84 ColonyID    |                                          | 8.61 ColonyID    |                                          | 9.32 ColonyID    |                    | 10.68 ColonyID   |               | 11.94 ColonyID   |       |
|                     | ICC                     | 0.34             |                                          | 0.34             |                                          | 0.36             |                    | 0.39             |               | 0.42             |       |
|                     | N                       | 13 ColonyID      |                                          | 13 ColonyID      |                                          | 13 ColonyID      |                    | 13 ColonyID      |               | 13 ColonyID      |       |
|                     | Obs.                    | 24               |                                          | 24               |                                          | 24               |                    | 24               |               | 24               |       |



|                     |       |       |       |       |       |
|---------------------|-------|-------|-------|-------|-------|
| Marg.R <sup>2</sup> | 0.090 | 0.094 | 0.079 | 0.043 | 0.000 |
| Cond.R <sup>2</sup> | 0.404 | 0.400 | 0.409 | 0.418 | 0.418 |

126 †: Generalized linear mixed model: CT<sub>TEMP</sub> ~ 1+ Variable + (1|ColonyID)

127 Table S4. Numbers of differentially expressed genes (DEG) as a function of thermal  
 128 treatment and/or region of origin from linear models in limma. The total number of genes  
 129 assigned to a model are based on either the *selectModel* default results or simplest model  
 130 within 2 of the absolute lowest AIC for colony blocked data. The numbers and  
 131 percentages of genes within each best-fitting model that are differentially expressed in at  
 132 least one region, treatment, or region:treatment contrast in the individual gene analyses  
 133 (FDR cutoff of  $\leq 0.05$ ) are provided in parentheses. Given that the gene assignment to a  
 134 linear model necessitates exclusion from other possible models, any individual gene may  
 135 be significant in contrasts that don't align with its linear model categorization.  
 136

| Model Name            | Model Formula                                  | <i>selectModel</i><br>(DEG) | Simplest Model<br>(DEG) |
|-----------------------|------------------------------------------------|-----------------------------|-------------------------|
| Total Genes = 9328    |                                                |                             |                         |
| None                  | ~ 1                                            | 3654 (0, 0%)                | 5032 (1, 0%)            |
| Region                | ~ 0 + Region                                   | 2855 (57, 2%)               | 2581 (66, 3%)           |
| Treatment             | ~ 0 + Treatment                                | 1393 (201, 14%)             | 1049 (242, 23%)         |
| Treatment +<br>Region | ~ 0 + Treatment + Region                       | 1056 (122, 11%)             | 494 (101, 20%)          |
| Full                  | ~ 0 + Treatment + Region +<br>Treatment*Region | 370 (62, 17%)               | 172 (32, 19%)           |

137  
 138

139 **Dataset S1 (separate file)**

140 Results of physiological test of thermal maximums and minimums of *Bombus*  
141 *vosnesenskii* bumble bee workers raised in a common laboratory environment from  
142 queens collected from altitudinally and latitudinally distinct populations.

143 **Dataset S2 (separate file)**

144 Results of edgeR/Limma individual gene-by-gene analysis of differential gene  
145 expression for thermally stressed *Bombus vosnesenskii* bumble bee workers raised in a  
146 common laboratory environment from queens collected from altitudinally and  
147 latitudinally distinct populations, including gene ontology results.

148 **Dataset S3 (separate file)**

149 Results of WGCNA analysis of patterns of differential gene expression for thermally  
150 stressed *Bombus vosnesenskii* bumble bee workers raised in a common laboratory  
151 environment from queens collected from altitudinally and latitudinally distinct  
152 populations, including gene ontology results.

153

154

155

156  
157  
158  
159  
160  
161  
162  
163  
164  
165  
166  
167  
168  
169  
170  
171  
172  
173  
174  
175  
176  
177  
178  
179  
180  
181  
182  
183  
184  
185  
186  
187  
188  
189  
190  
191  
192  
193  
194

## References

1. Goulson, D., Hanley, M. E., Darvill, B., Ellis, J. S. & Knight, M. E. Causes of rarity in bumblebees. *Biol. Conserv.* **122**, 1–8 (2005).
2. Evans, E., Burns, I. & Spivak, M. S. *Befriending bumble bees: a practical guide to raising local bumble bees*. (University of Minnesota, 2007).
3. Strange, J. P. Nest initiation in three North American bumble bees (*Bombus*): Gyne number and presence of honey bee workers influence establishment success and colony size. *J. Insect Sci.* **10**, (2010).
4. R Core team. R Core Team. *R: A Language and Environment for Statistical Computing*. R Foundation for Statistical Computing, Vienna, Austria. ISBN 3-900051-07-0, URL <http://www.R-project.org/>. **55**, 275–286 (2015).
5. Bates, D., Mächler, M., Bolker, B. & Walker, S. Fitting linear mixed-effects models using lme4. *J. Stat. Softw.* **67**, 1–48 (2015).
6. Kuznetsova, A., Brockhoff, P. B. & Christensen, R. H. B. lmerTest Package: tests in linear mixed effects models. *J. Stat. Softw.* **82**, (2017).
7. Bartoń, K. *MuMIn: Multi-model inference*. v.1.43.15 (R package, 2019).
8. Hijmans, R. J., Cameron, S. E., Parra, J. L., Jones, P. G. & Jarvis, A. Very high resolution interpolated climate surfaces for global land areas. *Int. J. Climatol.* **25**, 1965–1978 (2005).
9. Langfelder, P. & Horvath, S. WGCNA: an R package for weighted correlation network analysis. *BMC Bioinformatics* **9**, 559 (2008).
10. Campbell-Staton, S. C., Bare, A., Losos, J. B., Edwards, S. V. & Cheviron, Z. A. Physiological and regulatory underpinnings of geographic variation in reptilian cold tolerance across a latitudinal cline. *Mol. Ecol.* **27**, 2243–2255 (2018).
11. Cheviron, Z. A., Connaty, A. D., McClelland, G. B. & Storz, J. F. Functional genomics of adaptation to hypoxic cold-stress in high-altitude deer mice: Transcriptomic plasticity and thermogenic performance. *Evolution* **68**, 48–62 (2014).
12. Robinson, M. D., McCarthy, D. J. & Smyth, G. K. edgeR: a Bioconductor package for differential expression analysis of digital gene expression data. *Bioinformatics* **26**, 139–140 (2010).
13. Ritchie, M. E. *et al.* limma powers differential expression analyses for RNA-sequencing and microarray studies. *Nucleic Acids Res.* **43**, e47–e47 (2015).
14. Vuong, Q. H. Likelihood ratio tests for model selection and non-nested hypotheses. *Econometrica* **57**, 307 (1989).
15. Kenward, M. G. & Roger, J. H. An improved approximation to the precision of fixed effects from restricted maximum likelihood. *Comput. Stat. Data Anal.* **53**, 2583–2595 (2009).
